# Supplementary material for: A symmetric gradient structure enables robust CNF/FeCo/LM composite films with excellent electromagnetic interference shielding and electrical insulation
Source: Royal Society of Chemistry journal article supplement (doi:10.1039/d4ta08680e), 2025-01-01
Supplement: d4ta08680e1.pdf [file d4ta08680e1.pdf]

## Supporting Information

### Symmetric gradient structure enables robust CNF/FeCo/LM composite film with excellent electromagnetic interference shielding and electrical insulation

Song Yang, Maofei Du, Ying Zhang, Yuhan Wang, Ting Gu\*, Fei Liu\*

Provincial Guizhou Key Laboratory of Green Chemical and Clean Energy Technology, School of Chemistry and Chemical Engineering, Guizhou University, Guiyang 550025, Guizhou, China

**Table S1** The formula of the C/F<sub>7.3</sub>/L<sub>m:n</sub>-20 composite films with different LM gradient ratio.

| Sample                                   | Absorption layer | Transition layer | Reflection layer | Transition layer | Absorption layer |
|------------------------------------------|------------------|------------------|------------------|------------------|------------------|
| C/F <sub>7.3</sub> /L <sub>1:1</sub> -20 | CNF (g)          | 3.75             | 3.75             | 3.75             | 3.75             |
|                                          | FeCo (g)         | 0.0126           | 0.0054           | 0.0054           | 0.0126           |
|                                          | LM (g)           |                  | 0.0126           | 0.0126           | 0.0126           |
| C/F <sub>7.3</sub> /L <sub>1:2</sub> -20 | CNF (g)          | 3.75             | 3.75             | 3.75             | 3.75             |
|                                          | FeCo (g)         | 0.0126           | 0.0054           | 0.0054           | 0.0126           |
|                                          | LM (g)           |                  | 0.009            | 0.018            | 0.009            |
| C/F <sub>7.3</sub> /L <sub>1:3</sub> -20 | CNF (g)          | 3.75             | 3.75             | 3.75             | 3.75             |
|                                          | FeCo (g)         | 0.0126           | 0.0054           | 0.0054           | 0.0126           |
|                                          | LM (g)           |                  | 0.0072           | 0.0216           | 0.0072           |
| C/F <sub>7.3</sub> /L <sub>1:4</sub> -20 | CNF (g)          | 3.75             | 3.75             | 3.75             | 3.75             |
|                                          | FeCo (g)         | 0.0126           | 0.0054           | 0.0054           | 0.0126           |
|                                          | LM (g)           |                  | 0.006            | 0.024            | 0.006            |
| C/F <sub>7.3</sub> /L <sub>1:5</sub> -20 | CNF (g)          | 3.75             | 3.75             | 3.75             | 3.75             |
|                                          | FeCo (g)         | 0.0126           | 0.0054           | 0.0054           | 0.0126           |
|                                          | LM (g)           |                  | 0.0051           | 0.0255           | 0.0051           |

**Table S2** The formula of the C/F<sub>x:y</sub>/L<sub>1:3</sub>-20 composite films with different mass ratio of FeCo

| Sample                                   | Absorption layer | Transition layer | Reflection layer | Transition layer | Absorption layer |
|------------------------------------------|------------------|------------------|------------------|------------------|------------------|
| C/F <sub>5.5</sub> /L <sub>1:3</sub> -20 | CNF (g)          | 3.75             | 3.75             | 3.75             | 3.75             |
|                                          | FeCo (g)         | 0.009            | 0.009            | 0.009            | 0.009            |
|                                          | LM (g)           |                  | 0.0072           | 0.0216           | 0.0072           |
| C/F <sub>6.4</sub> /L <sub>1:3</sub> -20 | CNF (g)          | 3.75             | 3.75             | 3.75             | 3.75             |
|                                          | FeCo (g)         | 0.0108           | 0.0072           | 0.0072           | 0.0108           |

\* Corresponding author:

E-mail: [tgu@gzu.edu.cn](mailto:tgu@gzu.edu.cn) (T. Gu), [ce.feiliu@gzu.edu.cn](mailto:ce.feiliu@gzu.edu.cn) (F. Liu)

|                                          |          |        |        |        |        |        |
|------------------------------------------|----------|--------|--------|--------|--------|--------|
|                                          | LM (g)   |        | 0.0072 | 0.0216 | 0.0072 |        |
| C/F <sub>7.3</sub> /L <sub>1.3</sub> -20 | CNF (g)  | 3.75   | 3.75   |        | 3.75   | 3.75   |
|                                          | FeCo (g) | 0.0126 | 0.0054 |        | 0.0054 | 0.0126 |
|                                          | LM (g)   |        | 0.0072 | 0.0216 | 0.0072 |        |
| C/F <sub>8.2</sub> /L <sub>1.3</sub> -20 | CNF (g)  | 3.75   | 3.75   |        | 3.75   | 3.75   |
|                                          | FeCo (g) | 0.0144 | 0.0036 |        | 0.0036 | 0.0144 |
|                                          | LM (g)   |        | 0.0072 | 0.0216 | 0.0072 |        |
| C/F <sub>9.1</sub> /L <sub>1.3</sub> -20 | CNF (g)  | 3.75   | 3.75   |        | 3.75   | 3.75   |
|                                          | FeCo (g) | 0.0162 | 0.0018 |        | 0.0018 | 0.0162 |
|                                          | LM (g)   |        | 0.0072 | 0.0216 | 0.0072 |        |

**Table S3** The formula of the C/F<sub>8.2</sub>/L<sub>1.3</sub>-z composite films with different content of LM

| Sample                                   |          | Absorption layer | Transition layer | Reflection layer | Transition layer | Absorption layer |
|------------------------------------------|----------|------------------|------------------|------------------|------------------|------------------|
| C/F <sub>8.2</sub> /L <sub>1.3</sub> -10 | CNF (g)  | 3.75             | 3.75             |                  | 3.75             | 3.75             |
|                                          | FeCo (g) | 0.009            | 0.009            |                  | 0.009            | 0.009            |
|                                          | LM (g)   |                  | 0.0072           | 0.0216           | 0.0072           |                  |
| C/F <sub>8.2</sub> /L <sub>1.3</sub> -15 | CNF (g)  | 3.75             | 3.75             |                  | 3.75             | 3.75             |
|                                          | FeCo (g) | 0.0108           | 0.0072           |                  | 0.0072           | 0.0108           |
|                                          | LM (g)   |                  | 0.0072           | 0.0216           | 0.0072           |                  |
| C/F <sub>8.2</sub> /L <sub>1.3</sub> -20 | CNF (g)  | 3.75             | 3.75             |                  | 3.75             | 3.75             |
|                                          | FeCo (g) | 0.0126           | 0.0054           |                  | 0.0054           | 0.0126           |
|                                          | LM (g)   |                  | 0.0072           | 0.0216           | 0.0072           |                  |
| C/F <sub>8.2</sub> /L <sub>1.3</sub> -25 | CNF (g)  | 3.75             | 3.75             |                  | 3.75             | 3.75             |
|                                          | FeCo (g) | 0.0144           | 0.0036           |                  | 0.0036           | 0.0144           |
|                                          | LM (g)   |                  | 0.0072           | 0.0216           | 0.0072           |                  |
| C/F <sub>8.2</sub> /L <sub>1.3</sub> -30 | CNF (g)  | 3.75             | 3.75             |                  | 3.75             | 3.75             |
|                                          | FeCo (g) | 0.0162           | 0.0018           |                  | 0.0018           | 0.0162           |
|                                          | LM (g)   |                  | 0.0072           | 0.0216           | 0.0072           |                  |

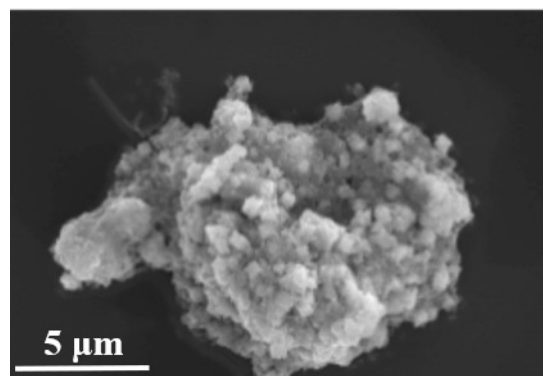

**Fig. S1** EDS mapping images of the scanning of FeCo nanoparticles.

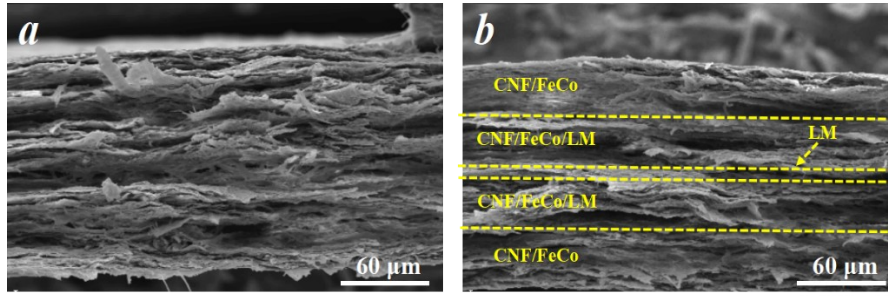

**Fig. S2** EDS mapping images of the scanning of blend C/F/L-20 film and C/F<sub>8:2</sub>/L<sub>1:3</sub>-20 composite films

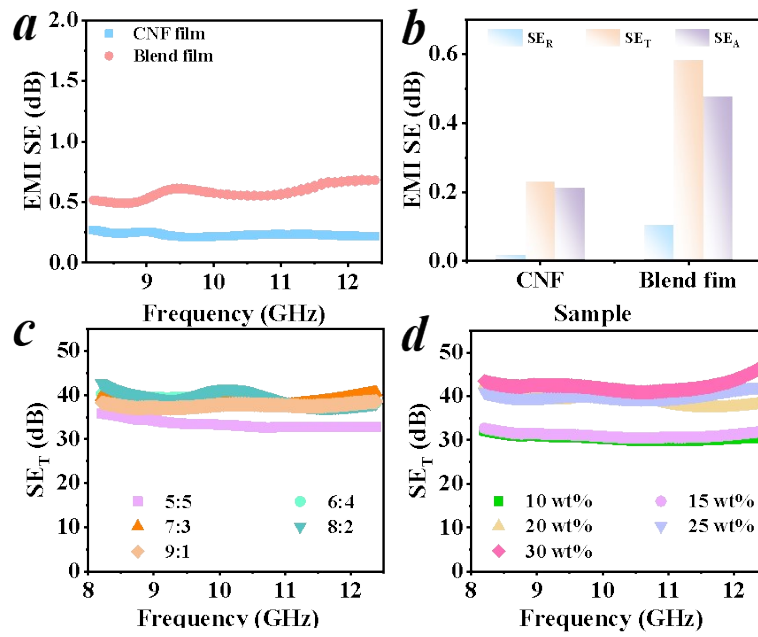

**Fig. S3** (a) EMI SE, (b)  $SE_T$ ,  $SE_R$ , and  $SE_A$  of pure CNF and blend C/F/L-20 film. (c) EMI SE of C/F<sub>x:y</sub>/L<sub>1:3</sub>-20 composite films. (d) EMI SE of C/F<sub>8:2</sub>/L<sub>1:3</sub>-z composite films with different content of LM.

**Table S4** The detailed information is listed of the filler content, thickness, and normalized SE of composite film.

| Sample                                                 | Conductive Filler                             | Filler Content (wt%) | Thickness (mm) | EMI SE (dB) | Normalized SE (dB mm <sup>-1</sup> ) | Ref. |
|--------------------------------------------------------|-----------------------------------------------|----------------------|----------------|-------------|--------------------------------------|------|
| CP/PGEF/Fe <sub>3</sub> O <sub>4</sub>                 | CP                                            | 30                   | 1              | 48.9        | 48.9                                 | [32] |
| PLLA/graphene                                          | Graphene                                      | 5.61                 | 0.3            | 41.7        | 139                                  | [33] |
| PVDF/graphene/Ni                                       | Graphene                                      | 10                   | 0.7            | 51.4        | 73.43                                | [34] |
| Cu-Ni/Wood                                             | Cu                                            | 23                   | 0.4            | 57.4        | 143.5                                | [35] |
| CI/Ti <sub>3</sub> C <sub>2</sub> T <sub>x</sub> /PVDF | Ti <sub>3</sub> C <sub>2</sub> T <sub>x</sub> | 10                   | 0.4            | 42.8        | 107                                  | [36] |
| CNF/Fe <sub>3</sub> O <sub>4</sub> /LM/GNPs            | LM/GNPs                                       | 40                   | 0.233          | 46.6        | 202.6                                | [37] |
| SR/graphene                                            | Graphene                                      | 3                    | 0.35           | 30.42       | 86.9                                 | [38] |

|                                                       |                                               |    |       |       |        |           |
|-------------------------------------------------------|-----------------------------------------------|----|-------|-------|--------|-----------|
| CNF/rGO                                               | rGO                                           | 50 | 3.023 | 32    | 10.59  | [39]      |
| PI/BNNS/Ti <sub>3</sub> C <sub>2</sub> T <sub>x</sub> | Ti <sub>3</sub> C <sub>2</sub> T <sub>x</sub> | 6  | 0.3   | 49.2  | 164    | [40]      |
| CNF/FeCo/LM                                           | LM                                            | 20 | 0.170 | 39.32 | 231.29 | This work |

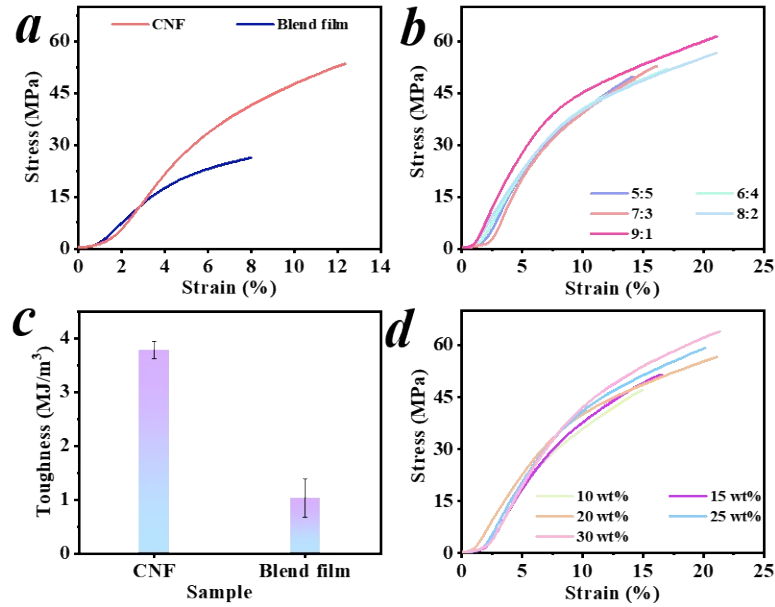

**Fig. S4** (a) Stress-strain curves of pure CNF and blend films. (b) Stress-strain curves of the  $C/F_{x,y}/L_{1:3}-20$  composite films. (c) Toughness of pure CNF and blend film. (d) Stress-strain curves of the  $C/F_{8:2}/L_{1:3}-z$  composite films with different LM content.

**Table S5** The detailed information is listed of the stress, strain, toughness, filler content, and EMI SE/filler content

| Sample                                      | Stress (MPa) | Strain (%) | Toughness (M.J. m <sup>-3</sup> ) | Conductivity filler content (wt%) | EMI/conductive filler content (dB/%) | Ref.      |
|---------------------------------------------|--------------|------------|-----------------------------------|-----------------------------------|--------------------------------------|-----------|
| CNF/Fe <sub>3</sub> O <sub>4</sub> /LM/GNPs | 55.27        | 12.47      | 2.72                              | 40                                | 1.17                                 | [33]      |
| MXene-xanthan                               | 116.48       | 1.22       | 0.84                              | 67                                | 0.46                                 | [42]      |
| CNF@MXene                                   | 112.5        | 4.3        | 2.7                               | 50                                | 0.79                                 | [43]      |
| NFC/Fe <sub>3</sub> O <sub>4</sub> &CNT/PEO | 36.03        | 19.1       | 2.98                              | 38.7                              | 0.88                                 | [44]      |
| MXene/ANF                                   | 124.1        | 8.1        | 6.3                               | 40                                | 1.02                                 | [45]      |
| MXene/UANF                                  | 156.9        | 3.34       | 2.9                               | 60                                | 0.53                                 | [46]      |
| MXene@HCNT                                  | 126.2        | 3.2        | 5.5                               | 50                                | 1.44                                 | [47]      |
| PEDOT: PSS/MXene                            | 38.6         | 0.28       | ~0.05                             | 30                                | 1.35                                 | [48]      |
| MXene/ANF                                   | 158.3        | 5.03       | 5.77                              | 80                                | 0.67                                 | [49]      |
| $C/F_{x,y}/L_{m:n}-z$                       | 56.28        | 21.47      | 7.2                               | 20                                | 1.97                                 | This work |
